# Supplementary material
Source: MDPI journal article supplement (https://www.mdpi.com/2075-163X/13/6/765)
Supplement: s1 [file s1]

**Table S1.** Biomass of *Baccharis salicifolia* and *Senecio subulatus* in aerial and roots parts in contaminated soil (SC) and blank soil (BS) with inoculation of AM fungi (M+) and without inoculation (M-) in the BR. Tukey HSD Test- Homogeneous group\* - Ss: *Senecio subulatus*; Bs *Baccharis salicifolia*, M Mychorrized, A: aerial part, R: roots. B: blank- C: contaminated soil.

|    | ID       | Weight   | 1    | 2    | 3    |
|----|----------|----------|------|------|------|
| 3  | Ss C R M | 1.00000  | **** | **** | **** |
| 7  | Bs B R   | 5.50000  | **** |      |      |
| 2  | Bs C R M | 7.00000  | **** |      |      |
| 9  | Ss B R   | 8.00000  | **** | **** |      |
| 5  | Bs C R   | 9.00000  | **** | **** |      |
| 11 | Ss B R M | 18.00000 | **** | **** | **** |
| 6  | Bs B A   | 30.00000 | **** | **** | **** |
| 4  | Bs C A   | 37.66667 | **** | **** | **** |
| 1  | Bs C A M | 43.00000 |      | **** | **** |
| 8  | Ss B A   | 48.50000 | **** | **** | **** |
| 10 | Ss B A M | 82.00000 |      |      | **** |
